# Supplementary material
Source: Elsevier journal article supplement (https://iris.unito.it/retrieve/8949130c-815c-4c0d-85b5-817927a887cc/mmc1.pdf)
Supplement: mmc1 [file mmc1.pdf]

# Supplementary figures

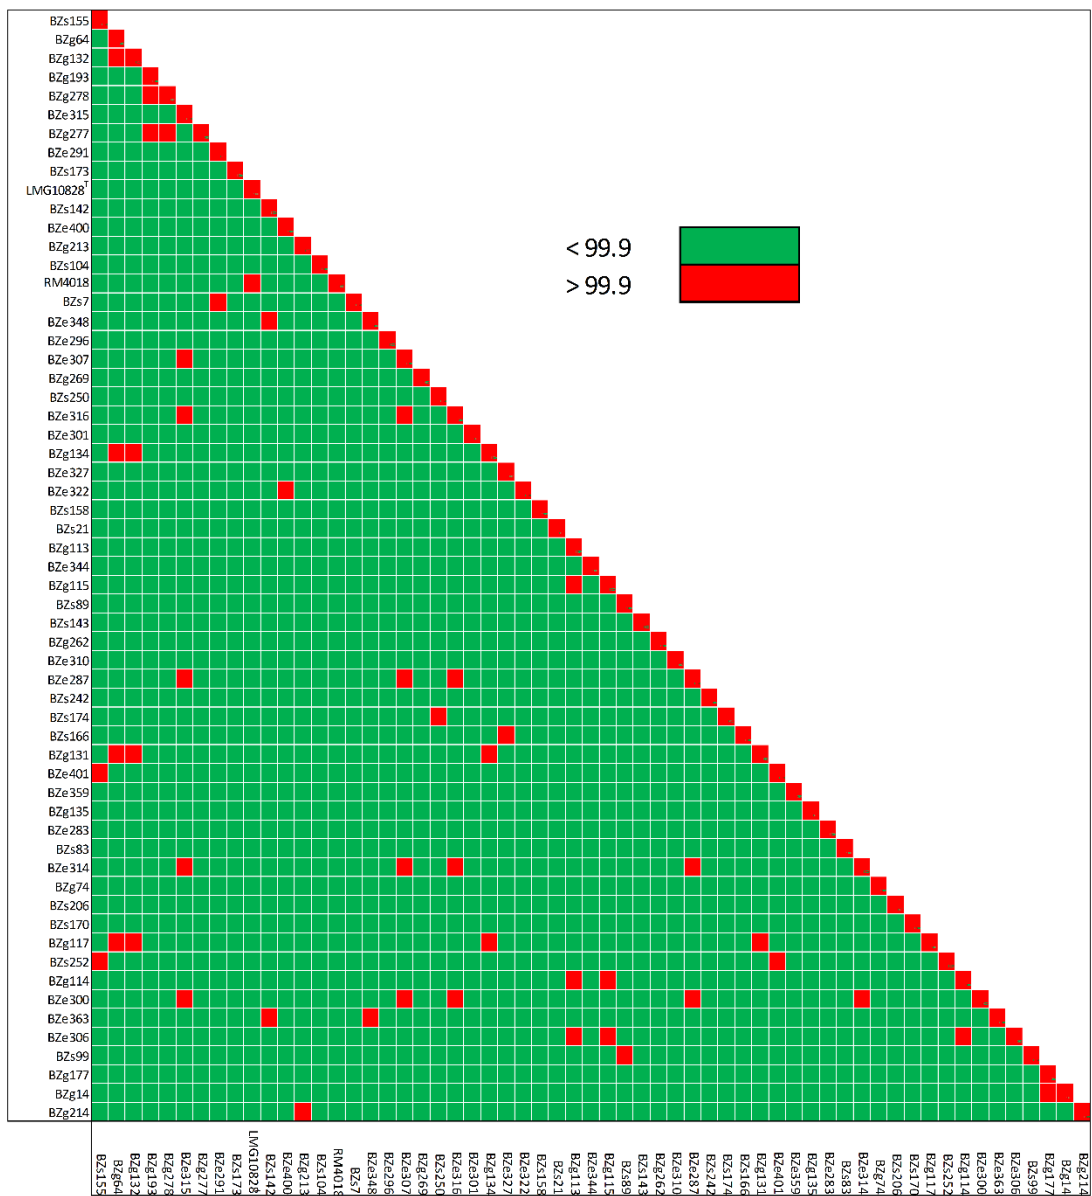

**Supplementary figure 1. Average nucleotide identity (ANI) values about 56 *A. butzleri* isolates.** The heatmap shows ANI value above (red) and below (green) 99.9%. Isolates that show ANI values below 99.9% are considered different strains. The genome of RM4018 and LMG 10828<sup>T</sup> were included as control (same strain).

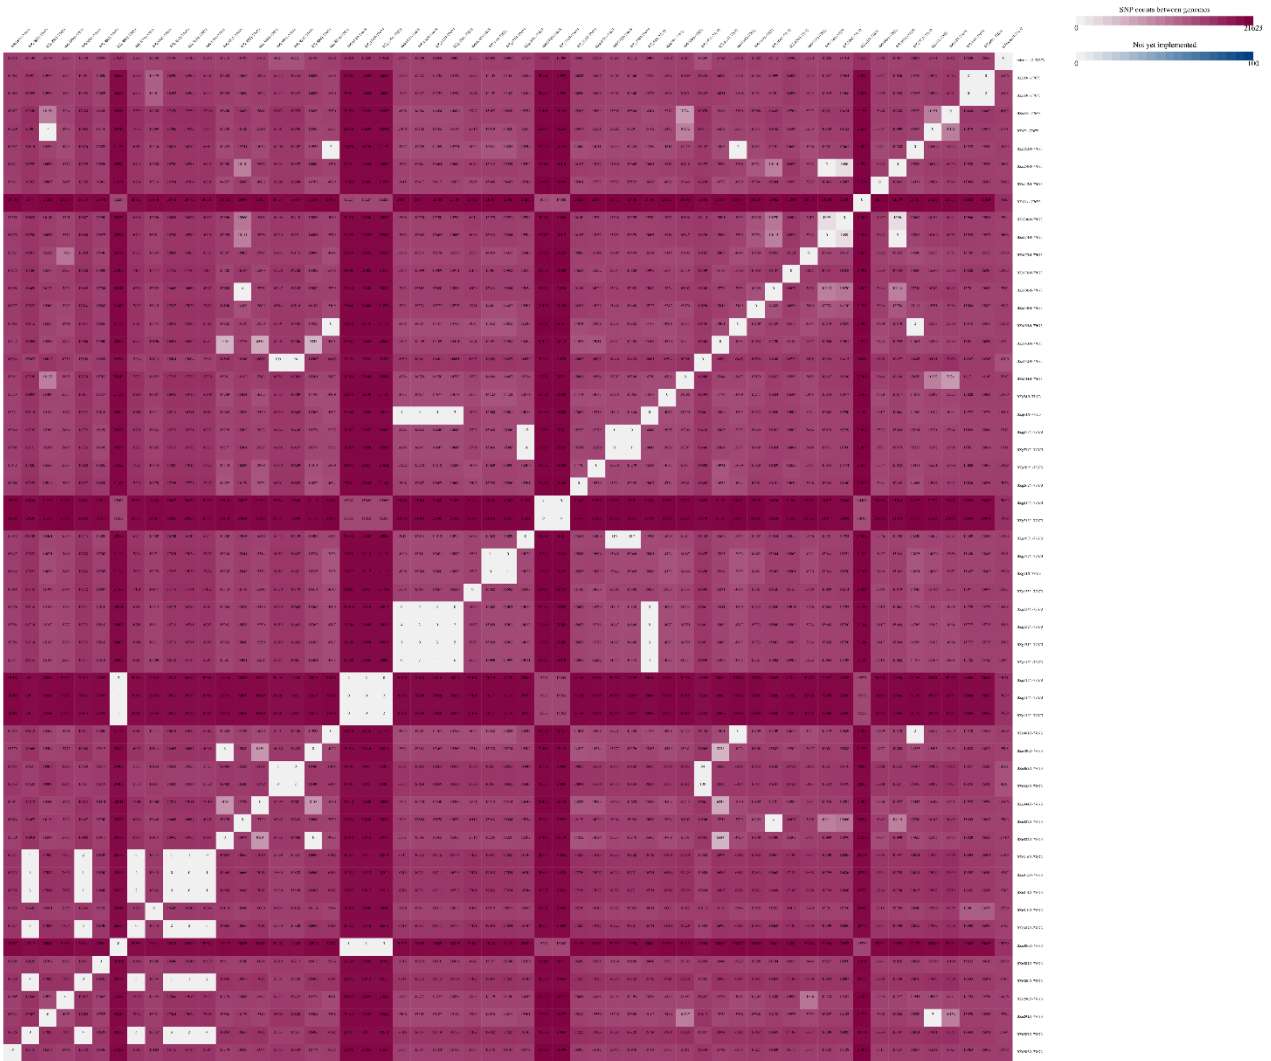

**Supplementary figure 2. Single nucleotide polymorphisms (SNPs) about 56 *A. butzleri* isolates.** The figure shows the number of SNPs between isolates. The genome of RM4018 was used for the alignment and included. Considering the ANI value ( $> 99.9\%$ ), BZs142 was considered equal to BZe348 and BZe363 even if the number of SNPs from the comparison with these isolates was respectively 100 and 94.

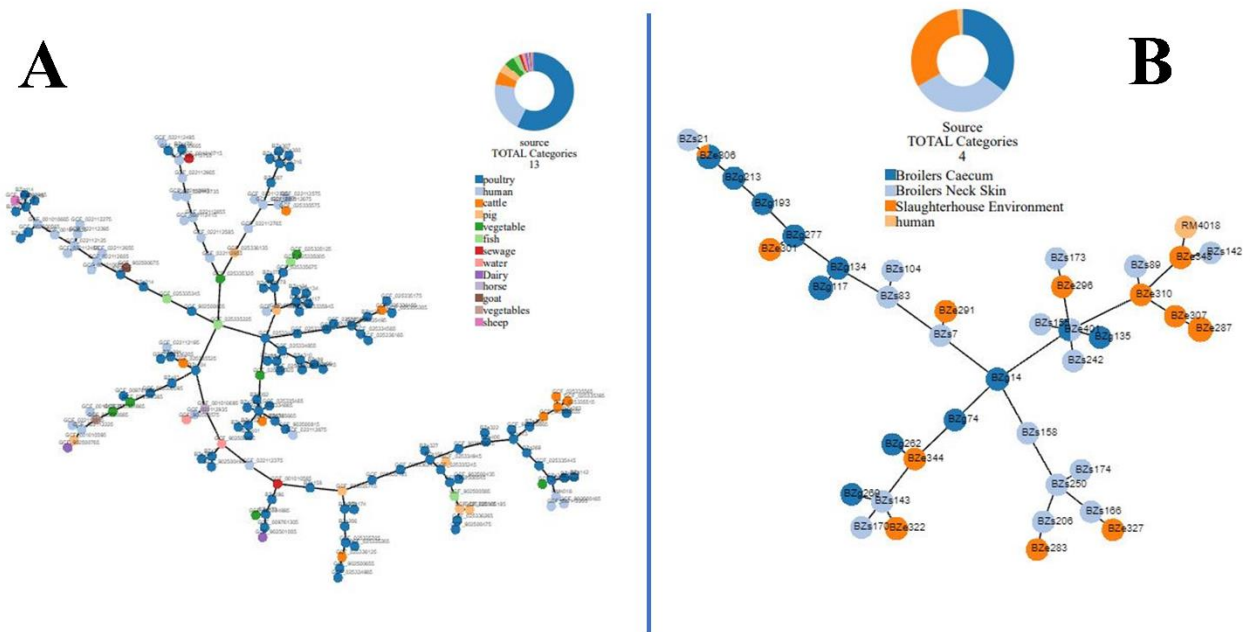

**Supplementary figure 3. Trees about cgMLST on 56 *A. butzleri* genomes including assemblies present in NCBI (A) and 56 *A. butzleri* isolates from BNS, BC and SE (B). The figure B includes the genome RM4018. The legend in figure A (profile size 1607) indicates the sources of isolation while the legend in figure B (profile size 1009) shows the isolation sources broilers caecum (BC), slaughterhouse environment (SE) and broiler neck skin (BNS). The isolation source of RM4018 is included as “human”.**

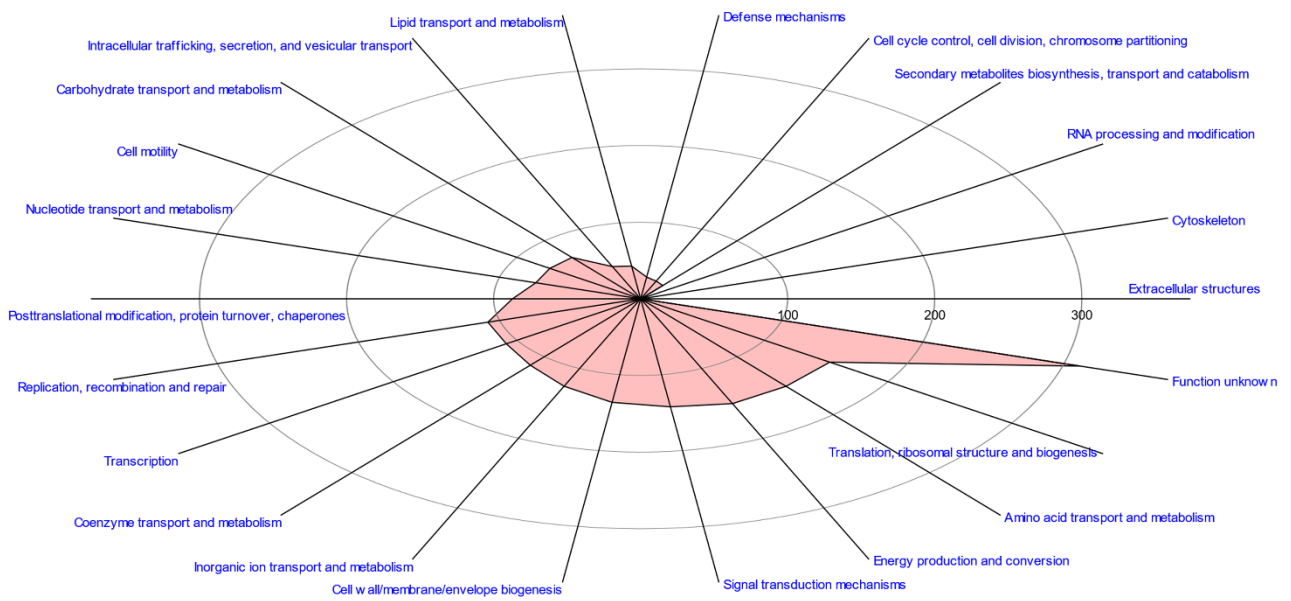

**Supplementary figure 4. Gene enrichment analysis (e-mapper) on *A. butzleri* genes.** The polar plot was produced on COGs average from the 31 *A. butzleri* strains isolated from BNS, BC and SE.

# Supplementary tables

**Supplementary table 1. Information about isolation sources (broilers and environmental samples) of *A. butzleri* isolates.** The table shows information about isolation source codes, antibiotic treatment (no\_ATB = absence of treatment), average weight, and age of broilers. The information about material, machines and slaughtering phase of SE samples are indicated in the second part of the table. The “DAY” numbers and the a/b letters after SE samples indicate different sampling days.

| <b>Flock code</b> | <b>Antibiotic treatment</b> | <b>Age (days)</b> | <b>Average weight (kg)</b> |
|-------------------|-----------------------------|-------------------|----------------------------|
| 1_DAY2            | Penicillin/Tetracycline     | 55                | 3.57                       |
| 1_DAY3            | Tetracycline                | 48                | 3.23                       |
| 1_DAY4            | Penicillin/Tetracycline     | 50                | 3.3                        |
| 1_DAY5            | no_ATB                      | 50                | 3.11                       |
| 1_DAY6            | no_ATB                      | 50                | 2.6                        |
| 1_DAY7            | no_ATB                      | 51                | 3.4                        |
| 1_DAY9            | Penicillin/Enrofloxacin     | 57                | 3.38                       |
| 2_DAY2            | Penicillin/Thiamphenicol    | 50                | 3.77                       |
| 2_DAY4            | no_ATB                      | 50                | 3.14                       |
| 2_DAY5            | no_ATB                      | 43                | 2.54                       |
| 2_DAY8            | no_ATB                      | 47                | 2.86                       |
| 2_DAY9            | Doxipan                     | 47                | 2.83                       |
| 3_DAY2            | no_ATB                      | 47                | 2.5                        |
| 3_DAY3            | Amoxindox                   | 48                | 3.22                       |
| 3_DAY4            | no_ATB                      | 47                | 3.48                       |
| 3_DAY6            | no_ATB                      | 47                | 3.07                       |
| 3_DAY7            | Amoxifarma                  | 53                | 3.53                       |
| 3_DAY8            | Amoxifarma                  | 50                | 3.27                       |
| 3_DAY9            | no_ATB                      | 50                | 3.78                       |
| 4_DAY4            | no_ATB                      | 47                | 2.9                        |
| 4_DAY5            | Amoxindox-Floxatril         | 50                | 3.8                        |
| 4_DAY6            | Amoxifarma                  | 54                | 3.61                       |
| 4_DAY7            | no_ATB                      | 47                | 3.5                        |
| 4_DAY8            | Amoxid                      | 50                | 3.59                       |
| 4_DAY9            | Prazil                      | 43                | 2.59                       |
| 5_DAY2            | no_ATB                      | 50                | 3.76                       |
| 5_DAY3            | Amoxifarma                  | 58                | 2.82                       |
| 5_DAY4            | Amoxifarma                  | 54                | 3.74                       |
| 5_DAY5            | Floxatril                   | 50                | 3.09                       |
| 5_DAY6            | Levoflok                    | 50                | 3.48                       |
| 5_DAY9            | Doxipan                     | 54                | 3.86                       |
| 6_DAY4            | no_ATB                      | 50                | 3.16                       |
| 6_DAY6            | no_ATB                      | 48                | 3.3                        |
| 6_DAY7            | Amoxid_Taf_25%              | 57                | 3.85                       |
| 6_DAY9            | Taf 25%                     | 51                | 3.47                       |
| 7_DAY2            | no_ATB                      | 43                | 2.7                        |
| 7_DAY9            | Doxipan Amoxifarma          | 50                | 3.75                       |

| <b>SE code</b> | <b>Material</b> | <b>Machine/function</b>          | <b>Phase</b>     |
|----------------|-----------------|----------------------------------|------------------|
| 1 a/b          | steel           | Scalding tank                    | Scalding         |
| 2 a/b          | Teflon/rubber   | Chicken plucker                  | Plucking         |
| 3 a/b          | Teflon/rubber   | Chicken plucker                  | Plucking         |
| 4 a/b          | steel           | Scalding tank                    | Scalding         |
| 5 a/b          | Teflon/rubber   | Chicken plucker                  | Plucking         |
| 6 a/b          | steel           | Chicken plucker                  | Plucking         |
| 7 a/b          | steel           | Cloaca opening machine           | Preparation      |
| 11 a/b         | Teflon/rubber   | Skin transport conveyors         | Skin removal     |
| 12 a/b         | steel           | Skin transport conveyors         | Skin removal     |
| 17 a/b         | Teflon/rubber   | Guts/giblets transport conveyors | Waste line       |
| 19 a/b         | steel           | Extractor                        | Interior removal |
| 20 a/b         | steel           | Neck-cutting                     | Neck removal     |

DAY2 (27<sup>th</sup> jan 2021); DAY3 (3<sup>rd</sup> feb 2021); DAY 4 (17<sup>th</sup> feb 2021); DAY5 (3<sup>rd</sup> mar 2021); DAY6 (16<sup>th</sup> mar 2021); DAY7 (16<sup>th</sup> apr 2021); DAY8 (5<sup>th</sup> may 2021)  
SE: a (24<sup>th</sup> jun 2021); b (24<sup>th</sup> mar 2022)



**Supplementary table 2. Metrics about *A. butzleri* genomes.** The table shows the following information about *A. butzleri* genomes: genome size (in Mbp), reads number, number of contigs and coverage (reads nr. \* reads length)/genome size). The information about functional annotation is included excluding multiple isolates (ANI > 99.9% and SNPs < 10).

| Isolate | Genome size Mbp | Reads nr | Contigs | Coverage | Total Genes | % of unknown function genes |
|---------|-----------------|----------|---------|----------|-------------|-----------------------------|
| BZe283  | 2.31            | 14604540 | 46      | 950      | 2308        | 50.61                       |
| BZe296  | 2.18            | 16407104 | 82      | 1128     | 2198        | 49.23                       |
| BZe301  | 2.19            | 17882118 | 36      | 1223     | 2173        | 47.26                       |
| BZe306  | 2.37            | 18230684 | 40      | 1154     | 2307        | 49.54                       |
| BZe310  | 2.16            | 16016130 | 57      | 1112     | 2164        | 47.55                       |
| BZe314  | 2.32            | 19786068 | 42      | 1279     | 2292        | 49.65                       |
| BZe322  | 2.11            | 17531452 | 33      | 1245     | 2121        | 46.77                       |
| BZe327  | 2.13            | 20586038 | 24      | 1447     | 2135        | 48.01                       |
| BZe344  | 2.17            | 21827612 | 28      | 1509     | 2213        | 49.53                       |
| BZe363  | 2.31            | 27456922 | 32      | 1782     | 2267        | 49.36                       |
| BZg134  | 2.32            | 17542324 | 63      | 1135     | 2321        | 50.71                       |
| BZg135  | 2.10            | 17857734 | 33      | 1274     | 2133        | 48.52                       |
| BZg177  | 2.14            | 23264286 | 96      | 1630     | 2160        | 48.38                       |
| BZg214  | 2.26            | 15894316 | 34      | 1054     | 2209        | 48.57                       |
| BZg262  | 2.05            | 18279838 | 23      | 1335     | 2072        | 46.24                       |
| BZg269  | 2.03            | 16499444 | 51      | 1217     | 2041        | 45.37                       |
| BZg278  | 2.16            | 15803232 | 21      | 1097     | 2160        | 47.87                       |
| BZg74   | 2.17            | 15526676 | 82      | 1072     | 2195        | 49.25                       |
| BZs104  | 2.16            | 11508306 | 77      | 801      | 2144        | 47.53                       |
| BZs143  | 2.12            | 18935560 | 59      | 1341     | 2160        | 47.04                       |
| BZs158  | 2.08            | 13862546 | 80      | 997      | 2095        | 47.49                       |
| BZs170  | 2.16            | 15062142 | 41      | 1046     | 2164        | 46.95                       |
| BZs173  | 2.26            | 15626580 | 70      | 1037     | 2305        | 50.15                       |
| BZs206  | 2.09            | 15139302 | 45      | 1086     | 2089        | 46.77                       |
| BZs21   | 2.24            | 14023472 | 41      | 941      | 2192        | 48.22                       |
| BZs242  | 2.10            | 17457894 | 40      | 1249     | 2101        | 46.69                       |
| BZs250  | 2.12            | 10142814 | 36      | 718      | 2125        | 47.62                       |
| BZs252  | 2.14            | 10786642 | 64      | 758      | 2136        | 47.10                       |
| BZs7    | 2.08            | 11552840 | 57      | 832      | 2049        | 45.58                       |
| BZs83   | 2.16            | 17277374 | 77      | 1202     | 2125        | 47.53                       |
| BZs99   | 2.11            | 9841820  | 58      | 699      | 2114        | 47.63                       |
| BZe287  | 2.32            | 14347992 | 49      | 928      | NA          | NA                          |
| BZe291  | 2.11            | 14992940 | 58      | 1066     | NA          | NA                          |
| BZe300  | 2.32            | 22744926 | 47      | 1471     | NA          | NA                          |
| BZe307  | 2.32            | 14320402 | 41      | 926      | NA          | NA                          |
| BZe315  | 2.32            | 21144274 | 48      | 1368     | NA          | NA                          |
| BZe316  | 2.32            | 9771964  | 48      | 632      | NA          | NA                          |
| BZe348  | 2.42            | 14725160 | 47      | 911      | NA          | NA                          |

|        |      |          |     |      |    |    |
|--------|------|----------|-----|------|----|----|
| BZe400 | 2.23 | 17520632 | 45  | 1181 | NA | NA |
| BZe401 | 2.13 | 20468432 | 79  | 1443 | NA | NA |
| BZg113 | 2.37 | 9962958  | 35  | 630  | NA | NA |
| BZg114 | 2.37 | 18314482 | 43  | 1159 | NA | NA |
| BZg115 | 2.37 | 14151178 | 50  | 896  | NA | NA |
| BZg117 | 2.29 | 17659272 | 83  | 1154 | NA | NA |
| BZg131 | 2.33 | 14414588 | 64  | 928  | NA | NA |
| BZg132 | 2.32 | 12496318 | 66  | 806  | NA | NA |
| BZg14  | 2.13 | 16931580 | 99  | 1191 | NA | NA |
| BZg193 | 2.15 | 14661550 | 22  | 1023 | NA | NA |
| BZg213 | 2.26 | 16522028 | 37  | 1096 | NA | NA |
| BZg277 | 2.16 | 12290076 | 21  | 853  | NA | NA |
| BZg64  | 2.32 | 20022516 | 64  | 1296 | NA | NA |
| BZs142 | 2.27 | 19305212 | 133 | 1276 | NA | NA |
| BZs155 | 2.14 | 16710130 | 75  | 1173 | NA | NA |
| BZs166 | 2.13 | 13279908 | 24  | 933  | NA | NA |
| BZs174 | 2.12 | 12290952 | 36  | 870  | NA | NA |
| BZs89  | 2.11 | 21102050 | 58  | 1499 | NA | NA |

**Supplementary table 3. Metadata about 166 genomes included in cgMLST analysis.** The table shows information about the genome included in cgMLST study. The genebank codes, strain location, year of sequencing, source of isolation are shown in the table. The column “type” indicates several group linked to isolation sources: animals, clinical, environment (env) and food.

| <b>Genome</b> | <b>Genebank</b> | <b>Location</b> | <b>Year</b> | <b>Source</b> | <b>Type</b> |
|---------------|-----------------|-----------------|-------------|---------------|-------------|
| BZe283        | n/a             | Italy           | 2021        | poultry       | env         |
| BZe287        | n/a             | Italy           | 2021        | poultry       | env         |
| BZe291        | n/a             | Italy           | 2021        | poultry       | env         |
| BZe296        | n/a             | Italy           | 2021        | poultry       | env         |
| BZe300        | n/a             | Italy           | 2022        | poultry       | env         |
| BZe301        | n/a             | Italy           | 2022        | poultry       | env         |
| BZe306        | n/a             | Italy           | 2022        | poultry       | env         |
| BZe307        | n/a             | Italy           | 2022        | poultry       | env         |
| BZe310        | n/a             | Italy           | 2022        | poultry       | env         |
| BZe314        | n/a             | Italy           | 2022        | poultry       | env         |
| BZe315        | n/a             | Italy           | 2022        | poultry       | env         |
| BZe316        | n/a             | Italy           | 2022        | poultry       | env         |
| BZe322        | n/a             | Italy           | 2022        | poultry       | env         |
| BZe327        | n/a             | Italy           | 2022        | poultry       | env         |
| BZe344        | n/a             | Italy           | 2022        | poultry       | env         |
| BZe348        | n/a             | Italy           | 2022        | poultry       | env         |
| BZe363        | n/a             | Italy           | 2022        | poultry       | env         |
| BZe400        | n/a             | Italy           | 2022        | poultry       | env         |
| BZe401        | n/a             | Italy           | 2022        | poultry       | animal      |
| BZg113        | n/a             | Italy           | 2021        | poultry       | animal      |
| BZg114        | n/a             | Italy           | 2021        | poultry       | animal      |
| BZg115        | n/a             | Italy           | 2021        | poultry       | animal      |
| BZg117        | n/a             | Italy           | 2021        | poultry       | animal      |
| BZg131        | n/a             | Italy           | 2021        | poultry       | animal      |
| BZg132        | n/a             | Italy           | 2021        | poultry       | animal      |
| BZg134        | n/a             | Italy           | 2021        | poultry       | animal      |
| BZg135        | n/a             | Italy           | 2021        | poultry       | animal      |
| BZg14         | n/a             | Italy           | 2021        | poultry       | animal      |
| BZg177        | n/a             | Italy           | 2021        | poultry       | animal      |
| BZg193        | n/a             | Italy           | 2021        | poultry       | animal      |
| BZg213        | n/a             | Italy           | 2021        | poultry       | animal      |
| BZg214        | n/a             | Italy           | 2021        | poultry       | animal      |
| BZg262        | n/a             | Italy           | 2021        | poultry       | animal      |
| BZg269        | n/a             | Italy           | 2021        | poultry       | animal      |
| BZg277        | n/a             | Italy           | 2021        | poultry       | animal      |
| BZg278        | n/a             | Italy           | 2021        | poultry       | animal      |
| BZg64         | n/a             | Italy           | 2021        | poultry       | animal      |
| BZg74         | n/a             | Italy           | 2021        | poultry       | animal      |
| BZs104        | n/a             | Italy           | 2021        | poultry       | animal      |
| BZs142        | n/a             | Italy           | 2021        | poultry       | animal      |

|               |               |         |      |         |          |
|---------------|---------------|---------|------|---------|----------|
| BZs143        | n/a           | Italy   | 2021 | poultry | animal   |
| BZs155        | n/a           | Italy   | 2021 | poultry | animal   |
| BZs158        | n/a           | Italy   | 2021 | poultry | animal   |
| BZs166        | n/a           | Italy   | 2021 | poultry | animal   |
| BZs170        | n/a           | Italy   | 2021 | poultry | animal   |
| BZs173        | n/a           | Italy   | 2021 | poultry | animal   |
| BZs174        | n/a           | Italy   | 2021 | poultry | animal   |
| BZs206        | n/a           | Italy   | 2021 | poultry | animal   |
| BZs21         | n/a           | Italy   | 2021 | poultry | animal   |
| BZs242        | n/a           | Italy   | 2021 | poultry | animal   |
| BZs250        | n/a           | Italy   | 2021 | poultry | animal   |
| BZs252        | n/a           | Italy   | 2021 | poultry | animal   |
| BZs7          | n/a           | Italy   | 2021 | poultry | animal   |
| BZs83         | n/a           | Italy   | 2021 | poultry | animal   |
| BZs89         | n/a           | Italy   | 2021 | poultry | animal   |
| BZs99         | n/a           | Italy   | 2021 | poultry | animal   |
| GCF_001010585 | GCF_001010585 | Canada  | 2008 | sewage  | env      |
| GCF_001010595 | GCF_001010595 | Canada  | 2009 | pig     | animal   |
| GCF_001010605 | GCF_001010605 | Canada  | 2008 | human   | clinical |
| GCF_001010615 | GCF_001010615 | Canada  | 2009 | human   | clinical |
| GCF_001010665 | GCF_001010665 | Canada  | 2008 | human   | clinical |
| GCF_001010675 | GCF_001010675 | Canada  | 2009 | human   | clinical |
| GCF_001010695 | GCF_001010695 | Canada  | 2009 | horse   | animal   |
| GCF_001010715 | GCF_001010715 | Canada  | 2009 | sewage  | env      |
| GCF_009761295 | GCF_009761295 | Germany | 2016 | poultry | env      |
| GCF_009761305 | GCF_009761305 | Germany | 2016 | poultry | env      |
| GCF_022112115 | GCF_022112115 | France  | 2016 | human   | clinical |
| GCF_022112125 | GCF_022112125 | France  | 2016 | human   | clinical |
| GCF_022112195 | GCF_022112195 | France  | 2016 | human   | clinical |
| GCF_022112205 | GCF_022112205 | France  | 2016 | human   | clinical |
| GCF_022112225 | GCF_022112225 | France  | 2016 | human   | clinical |
| GCF_022112275 | GCF_022112275 | France  | 2016 | human   | clinical |
| GCF_022112335 | GCF_022112335 | France  | 2016 | human   | clinical |
| GCF_022112375 | GCF_022112375 | France  | 2016 | human   | clinical |
| GCF_022112395 | GCF_022112395 | France  | 2016 | human   | clinical |
| GCF_022112415 | GCF_022112415 | France  | 2016 | human   | clinical |
| GCF_022112455 | GCF_022112455 | France  | 2016 | human   | clinical |
| GCF_022112495 | GCF_022112495 | France  | 2016 | human   | clinical |
| GCF_022112515 | GCF_022112515 | France  | 2016 | human   | clinical |
| GCF_022112575 | GCF_022112575 | France  | 2016 | human   | clinical |
| GCF_022112585 | GCF_022112585 | France  | 2016 | human   | clinical |
| GCF_022112605 | GCF_022112605 | France  | 2015 | human   | clinical |
| GCF_022112655 | GCF_022112655 | France  | 2015 | human   | clinical |
| GCF_022112675 | GCF_022112675 | France  | 2015 | human   | clinical |
| GCF_022112735 | GCF_022112735 | France  | 2015 | human   | clinical |

|               |               |        |      |           |          |
|---------------|---------------|--------|------|-----------|----------|
| GCF_022112755 | GCF_022112755 | France | 2015 | human     | clinical |
| GCF_022112765 | GCF_022112765 | France | 2015 | human     | clinical |
| GCF_022112815 | GCF_022112815 | France | 2015 | human     | clinical |
| GCF_022112855 | GCF_022112855 | France | 2015 | human     | clinical |
| GCF_022112875 | GCF_022112875 | France | 2015 | human     | clinical |
| GCF_022112895 | GCF_022112895 | France | 2015 | human     | clinical |
| GCF_022112905 | GCF_022112905 | France | 2015 | human     | clinical |
| GCF_022112935 | GCF_022112935 | France | 2014 | human     | clinical |
| GCF_022112955 | GCF_022112955 | France | 2014 | human     | clinical |
| GCF_025334585 | GCF_025334585 | China  | 2019 | poultry   | food     |
| GCF_025334795 | GCF_025334795 | China  | 2019 | pig       | food     |
| GCF_025334845 | GCF_025334845 | China  | 2019 | poultry   | food     |
| GCF_025334855 | GCF_025334855 | China  | 2019 | poultry   | food     |
| GCF_025334885 | GCF_025334885 | China  | 2019 | poultry   | food     |
| GCF_025334895 | GCF_025334895 | China  | 2019 | vegetable | food     |
| GCF_025334925 | GCF_025334925 | China  | 2019 | vegetable | food     |
| GCF_025334945 | GCF_025334945 | China  | 2019 | pig       | food     |
| GCF_025334965 | GCF_025334965 | China  | 2019 | vegetable | food     |
| GCF_025334985 | GCF_025334985 | China  | 2019 | poultry   | food     |
| GCF_025335005 | GCF_025335005 | China  | 2019 | fish      | food     |
| GCF_025335125 | GCF_025335125 | China  | 2019 | vegetable | food     |
| GCF_025335145 | GCF_025335145 | China  | 2019 | pig       | food     |
| GCF_025335165 | GCF_025335165 | China  | 2019 | poultry   | food     |
| GCF_025335175 | GCF_025335175 | China  | 2019 | poultry   | food     |
| GCF_025335185 | GCF_025335185 | China  | 2019 | pig       | food     |
| GCF_025335225 | GCF_025335225 | China  | 2019 | fish      | food     |
| GCF_025335245 | GCF_025335245 | China  | 2019 | poultry   | food     |
| GCF_025335265 | GCF_025335265 | China  | 2019 | poultry   | food     |
| GCF_025335285 | GCF_025335285 | China  | 2019 | poultry   | food     |
| GCF_025335305 | GCF_025335305 | China  | 2019 | poultry   | food     |
| GCF_025335325 | GCF_025335325 | China  | 2019 | vegetable | food     |
| GCF_025335345 | GCF_025335345 | China  | 2019 | fish      | food     |
| GCF_025335385 | GCF_025335385 | China  | 2019 | vegetable | food     |
| GCF_025335395 | GCF_025335395 | China  | 2019 | cattle    | food     |
| GCF_025335445 | GCF_025335445 | China  | 2019 | poultry   | food     |
| GCF_025335465 | GCF_025335465 | China  | 2019 | poultry   | food     |
| GCF_025335485 | GCF_025335485 | China  | 2019 | poultry   | food     |
| GCF_025335495 | GCF_025335495 | China  | 2019 | poultry   | food     |
| GCF_025335515 | GCF_025335515 | China  | 2019 | cattle    | food     |
| GCF_025335525 | GCF_025335525 | China  | 2019 | cattle    | food     |
| GCF_025335565 | GCF_025335565 | China  | 2019 | cattle    | food     |
| GCF_025335575 | GCF_025335575 | China  | 2019 | cattle    | food     |
| GCF_025335605 | GCF_025335605 | China  | 2019 | poultry   | food     |
| GCF_025335625 | GCF_025335625 | China  | 2019 | poultry   | food     |
| GCF_025335645 | GCF_025335645 | China  | 2019 | vegetable | food     |

|               |               |          |      |            |          |
|---------------|---------------|----------|------|------------|----------|
| GCF_025335665 | GCF_025335665 | China    | 2019 | cattle     | food     |
| GCF_025335675 | GCF_025335675 | China    | 2019 | poultry    | food     |
| GCF_025335705 | GCF_025335705 | China    | 2019 | poultry    | food     |
| GCF_025335745 | GCF_025335745 | China    | 2019 | pig        | food     |
| GCF_025335845 | GCF_025335845 | China    | 2019 | poultry    | food     |
| GCF_025336125 | GCF_025336125 | China    | 2019 | cattle     | food     |
| GCF_025336135 | GCF_025336135 | China    | 2019 | pig        | food     |
| GCF_025336155 | GCF_025336155 | China    | 2019 | cattle     | food     |
| GCF_025336185 | GCF_025336185 | China    | 2019 | poultry    | food     |
| GCF_025336205 | GCF_025336205 | China    | 2019 | poultry    | food     |
| GCF_025336225 | GCF_025336225 | China    | 2019 | poultry    | food     |
| GCF_025336245 | GCF_025336245 | China    | 2019 | poultry    | food     |
| GCF_025336265 | GCF_025336265 | China    | 2019 | poultry    | food     |
| GCF_902500435 | GCF_902500435 | Portugal | 2011 | poultry    | animal   |
| GCF_902500445 | GCF_902500445 | Portugal | 2011 | poultry    | animal   |
| GCF_902500465 | GCF_902500465 | Portugal | 2016 | water      | env      |
| GCF_902500475 | GCF_902500475 | Portugal | 2015 | poultry    | food     |
| GCF_902500485 | GCF_902500485 | France   | 2003 | human      | clinical |
| GCF_902500495 | GCF_902500495 | Portugal | 2015 | poultry    | food     |
| GCF_902500545 | GCF_902500545 | Portugal | 2011 | poultry    | animal   |
| GCF_902500565 | GCF_902500565 | Portugal | 2011 | poultry    | env      |
| GCF_902500575 | GCF_902500575 | Portugal | 2016 | water      | env      |
| GCF_902500585 | GCF_902500585 | Portugal | 2015 | fish       | food     |
| GCF_902500595 | GCF_902500595 | Portugal | 2011 | poultry    | env      |
| GCF_902500605 | GCF_902500605 | Portugal | 2015 | poultry    | food     |
| GCF_902500635 | GCF_902500635 | Portugal | 2015 | cattle     | food     |
| GCF_902500645 | GCF_902500645 | Portugal | 2016 | poultry    | food     |
| GCF_902500655 | GCF_902500655 | Portugal | 2016 | poultry    | food     |
| GCF_902500665 | GCF_902500665 | Portugal | 2016 | poultry    | food     |
| GCF_902500675 | GCF_902500675 | Portugal | 2015 | goat       | food     |
| GCF_902500685 | GCF_902500685 | Portugal | 2016 | vegetables | food     |
| GCF_902500765 | GCF_902500765 | Portugal | 2015 | Dairy      | env      |
| GCF_902500815 | GCF_902500815 | Portugal | 2011 | poultry    | animal   |
| GCF_902500965 | GCF_902500965 | Portugal | 2015 | sheep      | food     |
| GCF_902501005 | GCF_902501005 | Portugal | 2015 | Dairy      | env      |
| RM4018        | CP000361.1    | USA      | 2006 | human      | clinical |

**Supplementary table 4. Data about gene enrichment (e-mapper).** The table shows the number of genes related to different COGs categories in the 31 strains from BNS, BC and SE. The letters g, e and s in the strains names indicates isolation from BC, SE and BNS respectively.

|   | BZe<br>283 | BZe<br>363 | BZe<br>296 | BZe<br>301 | BZe<br>306 | BZe<br>310 | BZe<br>314 | BZe<br>322 | BZe<br>327 | BZe<br>344 | BZ<br>g74 | BZg<br>134 | BZg<br>135 | BZg<br>177 | BZg<br>214 | BZg<br>262 | BZg<br>269 | BZg<br>278 | B<br>Zs<br>7 | BZ<br>s21 | BZ<br>s83 | BZ<br>s99 | BZs<br>104 | BZs<br>143 | BZs<br>158 | BZs<br>170 | BZs<br>173 | BZs<br>206 | BZs<br>242 | BZs<br>250 | BZs<br>252 |   |
|---|------------|------------|------------|------------|------------|------------|------------|------------|------------|------------|-----------|------------|------------|------------|------------|------------|------------|------------|--------------|-----------|-----------|-----------|------------|------------|------------|------------|------------|------------|------------|------------|------------|---|
| A | 1          | 1          | 1          | 1          | 1          | 1          | 1          | 1          | 1          | 1          | 1         | 1          | 1          | 1          | 1          | 1          | 1          | 1          | 1            | 1         | 1         | 1         | 1          | 1          | 1          | 1          | 1          | 1          | 1          | 1          | 1          | 1 |
| B | 0          | 0          | 0          | 0          | 0          | 0          | 0          | 0          | 0          | 0          | 0         | 0          | 0          | 0          | 0          | 0          | 0          | 0          | 0            | 0         | 0         | 0         | 0          | 0          | 0          | 0          | 0          | 0          | 0          | 0          | 0          | 0 |
| C | 151        | 154        | 147        | 155        | 152        | 149        | 150        | 153        | 149        | 150        | 146       | 159        | 149        | 147        | 150        | 148        | 148        | 150        | 14           | 15        | 14        | 14        | 150        | 159        | 146        | 151        | 153        | 148        | 149        | 150        | 149        |   |
| D | 30         | 29         | 27         | 24         | 27         | 24         | 32         | 28         | 22         | 24         | 27        | 27         | 24         | 26         | 21         | 25         | 24         | 28         | 23           | 26        | 24        | 23        | 23         | 25         | 25         | 29         | 25         | 23         | 25         | 22         | 25         |   |
| E | 153        | 154        | 156        | 155        | 160        | 154        | 157        | 149        | 145        | 145        | 153       | 146        | 145        | 155        | 154        | 147        | 146        | 150        | 15           | 15        | 14        | 14        | 147        | 153        | 145        | 156        | 164        | 154        | 147        | 152        | 146        |   |
| F | 74         | 74         | 75         | 75         | 74         | 75         | 75         | 75         | 74         | 74         | 75        | 75         | 75         | 73         | 75         | 76         | 75         | 75         | 75           | 74        | 73        | 73        | 72         | 74         | 73         | 74         | 74         | 73         | 74         | 74         | 77         |   |
| G | 75         | 79         | 71         | 72         | 73         | 73         | 76         | 69         | 70         | 75         | 70        | 69         | 71         | 68         | 75         | 71         | 68         | 70         | 69           | 74        | 72        | 70        | 71         | 69         | 71         | 69         | 69         | 69         | 67         | 75         | 73         |   |
| H | 114        | 118        | 115        | 115        | 114        | 117        | 119        | 113        | 115        | 114        | 116       | 115        | 115        | 111        | 115        | 114        | 113        | 114        | 11           | 11        | 11        | 11        | 116        | 114        | 114        | 114        | 114        | 114        | 115        | 115        | 115        |   |
| I | 42         | 46         | 42         | 45         | 57         | 44         | 47         | 42         | 43         | 43         | 41        | 40         | 40         | 42         | 44         | 43         | 41         | 44         | 42           | 44        | 44        | 43        | 44         | 43         | 40         | 45         | 40         | 40         | 43         | 41         | 43         |   |
| J | 154        | 155        | 157        | 151        | 151        | 153        | 154        | 153        | 154        | 154        | 152       | 154        | 153        | 153        | 150        | 151        | 151        | 153        | 15           | 15        | 15        | 15        | 152        | 154        | 152        | 156        | 154        | 154        | 152        | 154        | 152        |   |
| K | 118        | 114        | 108        | 120        | 120        | 111        | 123        | 102        | 105        | 103        | 110       | 117        | 106        | 108        | 113        | 104        | 98         | 108        | 10           | 11        | 10        | 11        | 110        | 106        | 99         | 109        | 121        | 97         | 101        | 101        | 104        |   |
| L | 111        | 92         | 113        | 97         | 108        | 103        | 94         | 107        | 92         | 114        | 136       | 156        | 100        | 124        | 98         | 100        | 98         | 108        | 98           | 91        | 11        | 10        | 103        | 108        | 95         | 108        | 124        | 104        | 108        | 110        | 136        |   |
| M | 142        | 150        | 127        | 135        | 149        | 140        | 144        | 133        | 143        | 128        | 131       | 139        | 133        | 134        | 147        | 131        | 128        | 139        | 12           | 14        | 14        | 13        | 134        | 132        | 127        | 140        | 137        | 133        | 138        | 139        | 138        |   |

|   |                                                               |     |     |     |     |     |     |     |     |     |     |     |     |     |     |     |     |     |     |    |    |    |    |     |     |     |     |     |     |     |     |     |  |  |
|---|---------------------------------------------------------------|-----|-----|-----|-----|-----|-----|-----|-----|-----|-----|-----|-----|-----|-----|-----|-----|-----|-----|----|----|----|----|-----|-----|-----|-----|-----|-----|-----|-----|-----|--|--|
|   | ne/envelope biogenesis                                        |     |     |     |     |     |     |     |     |     |     |     |     |     |     |     |     |     |     |    |    |    |    |     |     |     |     |     |     |     |     |     |  |  |
| N | Cell motility                                                 | 74  | 77  | 69  | 73  | 75  | 75  | 75  | 78  | 77  | 74  | 73  | 74  | 71  | 73  | 77  | 74  | 73  | 73  | 69 | 76 | 71 | 73 | 72  | 70  | 73  | 71  | 72  | 72  | 74  | 72  | 77  |  |  |
| O | Posttranslational modification, protein turnover, chaperones  | 91  | 85  | 89  | 89  | 87  | 86  | 85  | 87  | 86  | 92  | 90  | 89  | 87  | 89  | 86  | 88  | 86  | 89  | 87 | 83 | 85 | 82 | 85  | 89  | 85  | 89  | 93  | 84  | 87  | 84  | 89  |  |  |
| P | Inorganic ion transport and metabolism                        | 125 | 148 | 124 | 134 | 144 | 126 | 139 | 121 | 122 | 118 | 122 | 123 | 115 | 116 | 141 | 118 | 120 | 119 | 12 | 14 | 12 | 12 | 131 | 121 | 120 | 131 | 126 | 122 | 120 | 118 | 116 |  |  |
| Q | Secondary metabolites biosynthesis, transport and catabolism  | 22  | 28  | 22  | 25  | 34  | 24  | 26  | 23  | 23  | 21  | 19  | 22  | 21  | 21  | 26  | 22  | 22  | 23  | 22 | 27 | 24 | 21 | 23  | 21  | 21  | 28  | 19  | 19  | 26  | 19  | 19  |  |  |
| R | General function prediction only                              | 0   | 0   | 0   | 0   | 0   | 0   | 0   | 0   | 0   | 0   | 0   | 0   | 0   | 0   | 0   | 0   | 0   | 0   | 0  | 0  | 0  | 0  | 0   | 0   | 0   | 0   | 0   | 0   | 0   | 0   | 0   |  |  |
| S | Function unknown                                              | 323 | 328 | 323 | 308 | 325 | 311 | 335 | 308 | 302 | 307 | 315 | 323 | 322 | 305 | 303 | 304 | 286 | 312 | 30 | 30 | 31 | 31 | 313 | 307 | 296 | 314 | 326 | 307 | 303 | 312 | 307 |  |  |
| T | Signal transduction mechanisms                                | 144 | 158 | 140 | 152 | 162 | 150 | 156 | 137 | 141 | 132 | 144 | 142 | 135 | 144 | 156 | 139 | 137 | 137 | 13 | 15 | 13 | 14 | 145 | 129 | 139 | 137 | 143 | 131 | 138 | 133 | 137 |  |  |
| U | Intracellular trafficking, secretion, and vesicular transport | 47  | 50  | 43  | 47  | 54  | 44  | 52  | 44  | 46  | 52  | 52  | 45  | 42  | 45  | 50  | 44  | 43  | 44  | 45 | 59 | 44 | 44 | 46  | 43  | 43  | 46  | 47  | 44  | 42  | 44  | 43  |  |  |
| V | Defense mechanisms                                            | 38  | 27  | 27  | 27  | 36  | 26  | 35  | 26  | 29  | 32  | 26  | 29  | 29  | 30  | 34  | 23  | 23  | 31  | 25 | 30 | 25 | 26 | 29  | 29  | 25  | 27  | 31  | 25  | 30  | 31  | 27  |  |  |
| W | Extracellular structures                                      | 0   | 1   | 0   | 0   | 0   | 0   | 0   | 0   | 0   | 0   | 0   | 0   | 0   | 0   | 0   | 0   | 0   | 0   | 0  | 0  | 0  | 0  | 0   | 0   | 0   | 0   | 0   | 0   | 0   | 0   | 0   |  |  |
| Y | Nuclear structure                                             | 0   | 0   | 0   | 0   | 0   | 0   | 0   | 0   | 0   | 0   | 0   | 0   | 0   | 0   | 0   | 0   | 0   | 0   | 0  | 0  | 0  | 0  | 0   | 0   | 0   | 0   | 0   | 0   | 0   | 0   | 0   |  |  |
| Z | Cytoskeleton                                                  | 1   | 1   | 1   | 1   | 1   | 1   | 1   | 1   | 1   | 1   | 1   | 1   | 1   | 1   | 1   | 1   | 1   | 1   | 1  | 1  | 1  | 1  | 1   | 0   | 1   | 1   | 1   | 0   | 1   | 0   | 1   |  |  |



**Supplementary table 5. *A. butzleri* pangenome partitions.** The pangenome partitions of *A. butzleri* evaluated by different tool are shown in the table that reports the pangenome partition, the tool used, and gene number.

| <b>Genome partition</b> | <b>Tool</b> | <b>% of genomes</b> | <b>Gene Nr.</b> |
|-------------------------|-------------|---------------------|-----------------|
| Core genes              | Roary       | 99-100              | 1534            |
| Soft core genes         | Roary       | 95-100              | 98              |
| Shell genes             | Roary       | 15-95               | 724             |
| Cloud genes             | Roary       | 0-15                | 5108            |
| Core genes              | Panaroo     | 99-100              | 1693            |
| Soft core genes         | Panaroo     | 95-100              | 53              |
| Shell genes             | Panaroo     | 15-95               | 576             |
| Cloud genes             | Panaroo     | 0-15                | 3231            |
| Persistent              | PpanGGolin  |                     | 1794            |
| Cloud                   | PpanGGolin  |                     | 4043            |
| Shell                   | PpanGGolin  |                     | 277             |

**Supplementary table 6. Biofilm formation index of *A. butzleri*.** The table shows the 31 strains analysed for biofilm formation, the sources of isolation are indicated in the left column: BC= broiler caecum, BNS=broiler neck skin, SE=superficial environment. Biofilm Formation Index values registered for each strain are indicated as BFI and standard deviations (Dev.st) are reported for each value.

| Source of isolation | <i>A. butzleri</i> strains | BFI   | Dev.st |
|---------------------|----------------------------|-------|--------|
| BC                  | BZg278                     | 2,93  | 0,42   |
| SE                  | BZe306                     | 2,75  | 1,20   |
| BNS                 | BZs99                      | 0,00  | 0,01   |
| BNS                 | BZs83                      | 0,00  | 0,20   |
| BNS                 | BZs7                       | 0,00  | 0,04   |
| BC                  | BZg74                      | 0,00  | 0,20   |
| SE                  | BZe363                     | 0,00  | 0,06   |
| SE                  | BZe344                     | 0,00  | 0,01   |
| BNS                 | BZs252                     | -0,11 | 0,02   |
| BNS                 | BZs104                     | -0,14 | 0,10   |
| SE                  | BZe296                     | -0,15 | 0,05   |
| BC                  | BZg134                     | -0,16 | 0,03   |
| SE                  | BZe282                     | -0,18 | 0,03   |
| BC                  | BZg177                     | -0,19 | 0,01   |
| BNS                 | BZs206                     | -0,19 | 0,08   |
| BC                  | BZg262                     | -0,22 | 0,01   |
| SE                  | BZe327                     | -0,23 | 0,05   |
| BNS                 | BZs173                     | -0,25 | 0,04   |
| BNS                 | BZs158                     | -0,25 | 0,03   |
| BC                  | BZg135                     | -0,25 | 0,05   |
| BNS                 | BZs21                      | -0,25 | 0,04   |
| SE                  | BZe314                     | -0,26 | 0,02   |
| BNS                 | BZs250                     | -0,26 | 0,04   |
| SE                  | BZe310                     | -0,26 | 0,04   |
| BNS                 | BZs170                     | -0,27 | 0,05   |
| BC                  | BZg269                     | -0,28 | 0,00   |
| SE                  | BZe301                     | -0,29 | 0,03   |
| BC                  | BZg214                     | -0,29 | 0,06   |
| BNS                 | BZs143                     | -0,29 | 0,02   |
| SE                  | BZe322                     | -0,30 | 0,02   |
| BNS                 | BZs242                     | -0,31 | 0,04   |
|                     | LMG 10828 <sup>T</sup>     | -0,25 | 0,01   |

**Supplementary table 7. Colonization of the 31 *A. butzleri* strains tested.** The table shows the average bacterial load of the inoculum (T0), after washing steps (TC) and delta Log colonization of the *A. butzleri* strains and of the type strain LMG10828<sup>T</sup>, with standard errors.

| Strain                | Average |      |                        | Standard errors |      |                        |
|-----------------------|---------|------|------------------------|-----------------|------|------------------------|
|                       | T0      | TC   | $\Delta\log$<br>CFU/ml | T0              | TC   | $\Delta\log$<br>CFU/ml |
| BZe283                | 8.00    | 7.95 | -0.05                  | 0.23            | 0.92 | 0.83                   |
| BZe296                | 7.24    | 8.87 | 1.63                   | 0.16            | 0.17 | 0.01                   |
| BZe301                | 7.96    | 7.27 | -0.69                  | 0.25            | 0.33 | 0.55                   |
| BZe306                | 8.29    | 6.89 | -1.40                  | 0.30            | 0.26 | 0.17                   |
| BZe310                | 8.30    | 7.26 | -1.04                  | 0.09            | 0.29 | 0.21                   |
| BZe314                | 7.90    | 7.13 | -0.77                  | 0.10            | 0.22 | 0.20                   |
| BZe322                | 7.81    | 7.48 | -1.72                  | 0.27            | 0.16 | 0.11                   |
| BZe327                | 7.48    | 8.13 | 0.65                   | 0.25            | 0.37 | 0.49                   |
| BZe344                | 8.07    | 5.20 | -2.87                  | 0.22            | 0.69 | 0.80                   |
| BZe363                | 8.03    | 8.44 | 0.01                   | 0.18            | 0.38 | 0.23                   |
| BZg134                | 8.48    | 6.31 | -2.17                  | 0.18            | 0.19 | 0.02                   |
| BZg135                | 8.20    | 8.20 | -0.82                  | 0.06            | 1.11 | 0.66                   |
| BZg177                | 8.21    | 5.91 | -2.30                  | 0.17            | 0.40 | 0.27                   |
| BZg214                | 6.57    | 8.63 | 2.06                   | 0.39            | 0.30 | 0.10                   |
| BZg262                | 7.25    | 7.31 | 0.06                   | 0.46            | 0.53 | 0.63                   |
| BZg269                | 7.96    | 7.03 | -0.93                  | 0.32            | 0.30 | 0.21                   |
| BZg278                | 8.34    | 7.80 | -0.54                  | 0.17            | 0.28 | 0.19                   |
| BZg74                 | 7.84    | 6.15 | -1.69                  | 0.15            | 0.49 | 0.56                   |
| BZs104                | 7.22    | 7.58 | 0.36                   | 0.29            | 0.53 | 0.33                   |
| BZs143                | 7.38    | 5.99 | -1.38                  | 0.31            | 0.42 | 0.28                   |
| BZs158                | 7.35    | 7.82 | 0.47                   | 0.26            | 0.19 | 0.46                   |
| BZs170                | 7.61    | 7.89 | 0.28                   | 0.18            | 0.35 | 0.40                   |
| BZs173                | 8.43    | 7.03 | -1.40                  | 0.08            | 0.18 | 0.12                   |
| BZs206                | 7.52    | 7.97 | 0.45                   | 0.28            | 0.24 | 0.26                   |
| BZs21                 | 7.34    | 8.56 | 1.22                   | 0.47            | 0.65 | 0.71                   |
| BZs242                | 8.35    | 6.95 | -1.40                  | 0.17            | 1.30 | 1.47                   |
| BZs250                | 7.44    | 7.18 | -0.27                  | 0.48            | 0.27 | 0.32                   |
| BZs252                | 7.67    | 6.50 | -1.17                  | 0.14            | 0.08 | 0.22                   |
| BZs7                  | 8.39    | 6.54 | -1.85                  | 0.19            | 0.34 | 0.37                   |
| BZs83                 | 7.59    | 8.03 | 0.44                   | 0.09            | 0.90 | 0.82                   |
| BZs99                 | 8.48    | 7.88 | -0.60                  | 0.29            | 0.09 | 0.20                   |
| LMG10828 <sup>T</sup> | 8.31    | 6.71 | -1.60                  | 0.23            | 0.13 | 0.33                   |

**Supplementary table 8.** The table shows presence and absence of putative virulence genes in *A. butzleri* strains. The number 1 indicates the detection by direct alignment with sequences present in literature (figure 6B) while 2 indicates the detection using Dfast. Absence of genes is indicated by 0. The names of the proteins are indicated in the column GENE with the locus tag from Buzzanca and colleagues 2021 (10.1016/j.ygeno.2021.05.001).

| GENE                                          | BZs7 | BZs21 | BZg74 | BZs83 | BZs99 | BZs104 | BZg134 | BZg135 | BZs143 | BZs158 | BZs170 | BZs173 | BZg177 | BZs206 | BZg214 | BZs242 | BZs250 | BZs252 | BZg262 | BZg269 | BZg278 | BZs283 | BZs296 | BZs301 | BZs306 | BZs310 | BZs314 | BZs322 | BZs327 | BZs344 | BZs363 |   |
|-----------------------------------------------|------|-------|-------|-------|-------|--------|--------|--------|--------|--------|--------|--------|--------|--------|--------|--------|--------|--------|--------|--------|--------|--------|--------|--------|--------|--------|--------|--------|--------|--------|--------|---|
| S_02099spore coat polysaccharide biosynthesis | 2    | 2     | 2     | 2     | 2     | 2      | 2      | 2      | 2      | 2      | 2      | 2      | 2      | 2      | 2      | 2      | 2      | 2      | 2      | 2      | 2      | 0      | 2      | 2      | 0      | 2      | 2      | 2      | 2      | 2      | 2      | 2 |
| Y_02513SwrC                                   | 1    | 1     | 0     | 0     | 0     | 0      | 0      | 0      | 0      | 0      | 0      | 0      | 0      | 0      | 0      | 0      | 0      | 0      | 0      | 0      | 0      | 0      | 0      | 0      | 0      | 0      | 0      | 0      | 0      | 0      | 0      |   |
| R_01795TabA                                   | 1    | 1     | 1     | 1     | 1     | 1      | 1      | 1      | 1      | 1      | 1      | 1      | 1      | 1      | 1      | 1      | 1      | 1      | 1      | 1      | 1      | 1      | 1      | 1      | 1      | 1      | 1      | 1      | 1      | 1      | 1      |   |
| R_01709Arylesteraseprecursor                  | 1    | 1     | 1     | 1     | 1     | 1      | 1      | 1      | 1      | 1      | 1      | 1      | 1      | 1      | 1      | 1      | 1      | 1      | 1      | 1      | 1      | 1      | 1      | 1      | 1      | 1      | 1      | 1      | 1      | 1      | 1      |   |
| F_01173Cj1349                                 | 1    | 1     | 1     | 1     | 1     | 1      | 1      | 1      | 1      | 1      | 1      | 1      | 1      | 1      | 1      | 1      | 1      | 1      | 1      | 1      | 1      | 1      | 1      | 1      | 1      | 1      | 1      | 1      | 1      | 1      | 1      |   |
| C_00304CadF                                   | 1    | 1     | 1     | 1     | 1     | 1      | 1      | 1      | 1      | 1      | 1      | 1      | 1      | 1      | 1      | 1      | 1      | 1      | 1      | 1      | 1      | 1      | 1      | 1      | 1      | 1      | 1      | 1      | 1      | 1      | 1      |   |
| C_01513similarToPorA                          | 1    | 1     | 1     | 1     | 1     | 1      | 1      | 1      | 1      | 1      | 1      | 1      | 1      | 1      | 1      | 1      | 1      | 1      | 1      | 1      | 1      | 1      | 1      | 1      | 1      | 1      | 1      | 1      | 1      | 1      | 1      |   |
| F_01320ciaB(hp)                               | 1    | 1     | 1     | 1     | 1     | 1      | 1      | 1      | 1      | 1      | 1      | 1      | 1      | 1      | 1      | 1      | 1      | 1      | 1      | 1      | 1      | 1      | 1      | 1      | 1      | 1      | 1      | 1      | 1      | 1      | 1      |   |
| C_01765irgA(cirA)                             | 1    | 1     | 1     | 1     | 1     | 1      | 1      | 1      | 1      | 1      | 1      | 1      | 1      | 1      | 1      | 1      | 1      | 1      | 1      | 1      | 1      | 1      | 1      | 1      | 1      | 1      | 1      | 1      | 1      | 1      | 1      |   |
| F_00673TonBdomain                             | 1    | 1     | 1     | 1     | 1     | 1      | 1      | 1      | 1      | 1      | 1      | 1      | 1      | 1      | 1      | 1      | 1      | 1      | 1      | 1      | 1      | 1      | 1      | 1      | 1      | 1      | 1      | 1      | 1      | 1      | 1      |   |
| F_01740transportproteinTonBdomain             | 1    | 1     | 1     | 1     | 1     | 1      | 1      | 1      | 1      | 1      | 1      | 1      | 2      | 2      | 2      | 2      | 2      | 2      | 2      | 2      | 2      | 2      | 2      | 2      | 2      | 2      | 2      | 2      | 2      | 2      | 2      |   |
| F_00451TonBreceptordomain                     | 2    | 2     | 2     | 2     | 2     | 2      | 2      | 2      | 2      | 2      | 2      | 2      | 2      | 2      | 2      | 2      | 2      | 2      | 2      | 2      | 2      | 2      | 2      | 2      | 2      | 2      | 2      | 2      | 2      | 2      | 2      |   |
| F_00164TdhA                                   | 2    | 2     | 2     | 2     | 2     | 2      | 2      | 2      | 2      | 2      | 2      | 2      | 2      | 2      | 2      | 2      | 2      | 2      | 2      | 2      | 2      | 2      | 2      | 2      | 2      | 2      | 2      | 2      | 2      | 2      | 2      |   |
| F_01366ExbB                                   | 1    | 1     | 1     | 1     | 1     | 1      | 1      | 1      | 1      | 1      | 1      | 1      | 1      | 1      | 1      | 1      | 1      | 1      | 1      | 1      | 1      | 1      | 1      | 1      | 1      | 1      | 1      | 1      | 1      | 1      | 1      |   |
| F_01365ExbD                                   | 1    | 1     | 1     | 1     | 1     | 1      | 1      | 1      | 1      | 1      | 1      | 1      | 1      | 1      | 1      | 1      | 1      | 1      | 1      | 1      | 1      | 1      | 1      | 1      | 1      | 1      | 1      | 1      | 1      | 1      | 1      |   |
| F_01417EpsE                                   | 1    | 1     | 1     | 1     | 1     | 1      | 1      | 1      | 1      | 1      | 1      | 1      | 1      | 1      | 1      | 1      | 1      | 1      | 1      | 1      | 1      | 1      | 1      | 1      | 1      | 1      | 1      | 1      | 1      | 1      | 1      |   |
| F_01416EpsF                                   | 1    | 1     | 1     | 1     | 1     | 1      | 1      | 1      | 1      | 1      | 1      | 1      | 1      | 1      | 1      | 1      | 1      | 1      | 1      | 1      | 1      | 1      | 1      | 1      | 1      | 1      | 1      | 1      | 1      | 1      | 1      |   |
| F_02073XcpQ                                   | 1    | 1     | 1     | 1     | 1     | 1      | 1      | 1      | 1      | 1      | 1      | 1      | 1      | 1      | 1      | 1      | 1      | 1      | 1      | 1      | 1      | 1      | 1      | 1      | 1      | 1      | 1      | 1      | 1      | 1      | 1      |   |
| F_00819PldA                                   | 1    | 1     | 1     | 1     | 1     | 1      | 1      | 1      | 1      | 1      | 1      | 1      | 1      | 1      | 1      | 1      | 1      | 1      | 1      | 1      | 1      | 1      | 1      | 1      | 1      | 1      | 1      | 1      | 1      | 1      | 1      |   |
| F_02071TlyA                                   | 1    | 1     | 1     | 1     | 1     | 1      | 1      | 1      | 1      | 1      | 1      | 1      | 1      | 1      | 1      | 1      | 1      | 1      | 1      | 1      | 1      | 1      | 1      | 1      | 1      | 1      | 1      | 1      | 1      | 1      | 1      |   |
| F_00802MviN                                   | 1    | 1     | 1     | 1     | 1     | 1      | 1      | 1      | 1      | 1      | 1      | 1      | 1      | 1      | 1      | 1      | 1      | 1      | 1      | 1      | 1      | 1      | 1      | 1      | 1      | 1      | 1      | 1      | 1      | 1      | 1      |   |
| F_00646HlyDdomain                             | 2    | 2     | 2     | 2     | 2     | 2      | 2      | 2      | 2      | 2      | 2      | 2      | 2      | 2      | 2      | 2      | 2      | 2      | 2      | 2      | 2      | 2      | 2      | 2      | 2      | 2      | 2      | 2      | 2      | 2      | 2      |   |
| F_00557HlyB                                   | 1    | 1     | 1     | 1     | 1     | 1      | 1      | 1      | 1      | 1      | 1      | 1      | 1      | 1      | 1      | 1      | 1      | 1      | 1      | 1      | 1      | 1      | 1      | 1      | 1      | 1      | 1      | 1      | 1      | 1      | 1      |   |
| F_00258HecA                                   | 1    | 1     | 1     | 1     | 1     | 1      | 1      | 1      | 1      | 1      | 1      | 1      | 1      | 1      | 1      | 1      | 1      | 1      | 1      | 1      | 1      | 1      | 1      | 1      | 1      | 1      | 1      | 1      | 1      | 1      | 1      |   |

|                                                 |   |   |   |   |   |   |   |   |   |   |   |   |   |   |   |   |   |   |   |   |   |   |   |   |   |   |   |   |   |   |
|-------------------------------------------------|---|---|---|---|---|---|---|---|---|---|---|---|---|---|---|---|---|---|---|---|---|---|---|---|---|---|---|---|---|---|
| F_00740HecB                                     | 0 | 2 | 0 | 0 | 0 | 0 | 0 | 0 | 0 | 0 | 0 | 0 | 0 | 0 | 0 | 0 | 0 | 0 | 0 | 0 | 0 | 0 | 2 | 0 | 0 | 0 | 0 | 0 | 2 |   |
| F_00751CyaA                                     | 0 | 2 | 2 | 0 | 0 | 0 | 0 | 2 | 0 | 2 | 0 | 2 | 2 | 2 | 0 | 2 | 0 | 0 | 2 | 0 | 2 | 2 | 0 | 2 | 0 | 0 | 0 | 2 | 0 | 2 |
| F_00615InJ                                      | 1 | 1 | 1 | 1 | 1 | 1 | 1 | 1 | 1 | 1 | 1 | 1 | 1 | 1 | 1 | 1 | 1 | 1 | 1 | 1 | 1 | 1 | 1 | 1 | 1 | 1 | 1 | 1 | 1 |   |
| F_02038PhoP                                     | 1 | 1 | 1 | 1 | 1 | 1 | 1 | 1 | 1 | 1 | 1 | 1 | 1 | 1 | 1 | 1 | 1 | 1 | 1 | 1 | 1 | 1 | 1 | 1 | 1 | 1 | 1 | 1 | 1 |   |
| F_00642PhoQ                                     | 2 | 2 | 2 | 2 | 2 | 2 | 2 | 2 | 2 | 2 | 2 | 2 | 2 | 2 | 2 | 2 | 2 | 2 | 2 | 2 | 2 | 2 | 2 | 2 | 2 | 2 | 2 | 2 | 2 |   |
| F_00593MprB                                     | 1 | 1 | 1 | 1 | 1 | 1 | 1 | 1 | 1 | 1 | 1 | 1 | 1 | 1 | 1 | 1 | 1 | 1 | 1 | 1 | 1 | 1 | 1 | 1 | 1 | 1 | 1 | 1 | 1 |   |
| F_00790ResA                                     | 1 | 1 | 1 | 1 | 1 | 1 | 1 | 1 | 1 | 1 | 1 | 1 | 1 | 1 | 1 | 1 | 1 | 1 | 1 | 1 | 1 | 1 | 1 | 1 | 1 | 1 | 1 | 1 | 1 |   |
| F_00882DSBA-likedomainprotein                   | 1 | 1 | 1 | 1 | 1 | 1 | 1 | 1 | 1 | 1 | 1 | 1 | 1 | 1 | 1 | 1 | 1 | 1 | 1 | 1 | 1 | 1 | 1 | 1 | 1 | 1 | 1 | 1 | 1 |   |
| F_00243FixL                                     | 1 | 1 | 1 | 1 | 1 | 1 | 1 | 1 | 1 | 1 | 1 | 1 | 1 | 1 | 1 | 1 | 1 | 1 | 1 | 1 | 1 | 1 | 1 | 1 | 1 | 1 | 1 | 1 | 1 |   |
| F_00184ZraS                                     | 1 | 1 | 1 | 1 | 1 | 1 | 1 | 1 | 1 | 1 | 1 | 1 | 1 | 1 | 1 | 1 | 1 | 1 | 1 | 1 | 1 | 1 | 1 | 1 | 1 | 1 | 1 | 1 | 1 |   |
| F_01409TrS                                      | 1 | 1 | 1 | 1 | 1 | 1 | 1 | 1 | 1 | 1 | 1 | 1 | 1 | 1 | 1 | 1 | 1 | 1 | 1 | 1 | 1 | 1 | 1 | 1 | 1 | 1 | 1 | 1 | 1 |   |
| F_00355pld                                      | 1 | 1 | 1 | 1 | 1 | 1 | 1 | 1 | 1 | 1 | 1 | 1 | 1 | 1 | 1 | 1 | 1 | 1 | 1 | 1 | 1 | 1 | 1 | 1 | 1 | 1 | 1 | 1 | 1 |   |
| F_01571STM3117                                  | 1 | 1 | 1 | 1 | 1 | 1 | 1 | 1 | 1 | 1 | 1 | 1 | 1 | 1 | 1 | 1 | 1 | 1 | 1 | 1 | 1 | 1 | 1 | 1 | 1 | 1 | 1 | 1 | 1 |   |
| F_02102EpsD                                     | 1 | 2 | 2 | 2 | 2 | 2 | 2 | 2 | 2 | 2 | 2 | 2 | 2 | 2 | 2 | 2 | 2 | 2 | 2 | 2 | 2 | 2 | 2 | 2 | 2 | 2 | 2 | 2 | 2 |   |
| F_00892epsM                                     | 1 | 1 | 1 | 1 | 1 | 1 | 1 | 1 | 1 | 1 | 1 | 1 | 1 | 1 | 1 | 1 | 1 | 1 | 1 | 1 | 1 | 1 | 1 | 1 | 1 | 1 | 1 | 1 | 1 |   |
| F_02099EpsJ                                     | 1 | 0 | 0 | 0 | 0 | 0 | 0 | 0 | 0 | 0 | 0 | 0 | 0 | 0 | 0 | 0 | 0 | 0 | 0 | 0 | 0 | 0 | 0 | 0 | 0 | 0 | 0 | 0 | 0 |   |
| F_01902mltA                                     | 1 | 1 | 1 | 1 | 1 | 1 | 1 | 1 | 1 | 1 | 1 | 1 | 1 | 1 | 1 | 1 | 1 | 1 | 1 | 1 | 1 | 1 | 1 | 1 | 1 | 1 | 1 | 1 | 1 |   |
| F_00703mltD                                     | 1 | 1 | 1 | 1 | 1 | 1 | 1 | 1 | 1 | 1 | 1 | 1 | 1 | 1 | 1 | 1 | 1 | 1 | 1 | 1 | 1 | 1 | 1 | 1 | 1 | 1 | 1 | 1 | 1 |   |
| F_00427BdlA                                     | 1 | 1 | 1 | 1 | 1 | 1 | 1 | 1 | 1 | 1 | 1 | 1 | 1 | 1 | 1 | 1 | 1 | 1 | 1 | 1 | 1 | 1 | 1 | 1 | 1 | 1 | 1 | 1 | 1 |   |
| F_01723O-Antigenligase                          | 2 | 2 | 2 | 2 | 2 | 2 | 2 | 2 | 2 | 2 | 2 | 2 | 2 | 2 | 2 | 2 | 2 | 2 | 2 | 2 | 2 | 2 | 2 | 2 | 2 | 2 | 2 | 2 | 2 |   |
| F_02088RfaC                                     | 1 | 1 | 1 | 1 | 1 | 1 | 1 | 1 | 1 | 1 | 1 | 1 | 1 | 1 | 1 | 1 | 1 | 1 | 1 | 1 | 1 | 1 | 1 | 1 | 1 | 1 | 1 | 1 | 1 |   |
| F_02010UreG                                     | 1 | 1 | 1 | 1 | 1 | 1 | 1 | 1 | 1 | 1 | 1 | 1 | 1 | 1 | 1 | 1 | 1 | 1 | 1 | 1 | 1 | 1 | 1 | 1 | 1 | 1 | 1 | 1 | 1 |   |
| F_02208UreF                                     | 1 | 2 | 2 | 2 | 2 | 2 | 2 | 2 | 2 | 2 | 2 | 2 | 2 | 2 | 2 | 2 | 2 | 2 | 2 | 2 | 2 | 2 | 2 | 2 | 2 | 2 | 2 | 2 | 2 |   |
| F_02209UreE                                     | 1 | 2 | 2 | 2 | 2 | 2 | 2 | 2 | 2 | 2 | 2 | 2 | 2 | 2 | 2 | 2 | 2 | 2 | 2 | 2 | 2 | 2 | 2 | 2 | 2 | 2 | 2 | 2 | 2 |   |
| F_02210ureC                                     | 1 | 2 | 2 | 2 | 2 | 2 | 2 | 2 | 2 | 2 | 2 | 2 | 2 | 2 | 2 | 2 | 2 | 2 | 2 | 2 | 2 | 2 | 2 | 2 | 2 | 2 | 2 | 2 | 2 |   |
| F_02211UreA                                     | 1 | 2 | 2 | 2 | 2 | 2 | 2 | 2 | 2 | 2 | 2 | 2 | 2 | 2 | 2 | 2 | 2 | 2 | 2 | 2 | 2 | 2 | 2 | 2 | 2 | 2 | 2 | 2 | 2 |   |
| F_02212UreD1                                    | 1 | 2 | 2 | 2 | 2 | 2 | 2 | 2 | 2 | 2 | 2 | 2 | 2 | 2 | 2 | 2 | 2 | 2 | 2 | 2 | 2 | 2 | 2 | 2 | 2 | 2 | 2 | 2 | 2 |   |
| F_01958FlagellarassemblyproteinH                | 1 | 1 | 1 | 1 | 1 | 1 | 1 | 1 | 1 | 1 | 1 | 1 | 1 | 1 | 1 | 1 | 1 | 1 | 1 | 1 | 1 | 1 | 1 | 1 | 1 | 1 | 1 | 1 | 1 |   |
| F_01956Flagellarbasalbodyrodmodificationprotein | 1 | 1 | 1 | 1 | 1 | 1 | 1 | 1 | 1 | 1 | 1 | 1 | 1 | 1 | 1 | 1 | 1 | 1 | 1 | 1 | 1 | 1 | 1 | 1 | 1 | 1 | 1 | 1 | 1 |   |
| F_00029Flagellarbasalbody-associatedproteinFliL | 1 | 1 | 1 | 1 | 1 | 1 | 1 | 1 | 1 | 1 | 1 | 1 | 1 | 1 | 1 | 1 | 1 | 1 | 1 | 1 | 1 | 1 | 1 | 1 | 1 | 1 | 1 | 1 | 1 |   |
| F_01940FlagellarbiosynthesisproteinFliR         | 1 | 1 | 1 | 1 | 1 | 1 | 1 | 1 | 1 | 1 | 1 | 1 | 1 | 1 | 1 | 1 | 1 | 1 | 1 | 1 | 1 | 1 | 1 | 1 | 1 | 1 | 1 | 1 | 1 |   |





|                                 |   |   |   |   |   |   |   |   |   |   |   |   |   |   |   |   |   |   |   |   |   |   |   |   |   |   |   |   |   |   |   |   |   |   |   |   |   |   |   |   |   |
|---------------------------------|---|---|---|---|---|---|---|---|---|---|---|---|---|---|---|---|---|---|---|---|---|---|---|---|---|---|---|---|---|---|---|---|---|---|---|---|---|---|---|---|---|
| F_00323InnermembraneproteinYjcH | 1 | 1 | 1 | 1 | 1 | 1 | 1 | 1 | 1 | 1 | 1 | 1 | 1 | 1 | 1 | 1 | 1 | 1 | 1 | 1 | 1 | 1 | 1 | 1 | 1 | 1 | 1 | 1 | 1 | 1 | 1 | 1 | 1 | 1 | 1 | 1 | 1 | 1 | 1 | 1 |   |
| F_00325InnermembraneproteinYjcH | 1 | 1 | 1 | 1 | 1 | 1 | 1 | 1 | 1 | 1 | 1 | 1 | 1 | 1 | 1 | 1 | 1 | 1 | 1 | 1 | 1 | 1 | 1 | 1 | 1 | 1 | 1 | 1 | 1 | 1 | 1 | 1 | 1 | 1 | 1 | 1 | 1 | 1 | 1 | 1 | 1 |

---
